# Supplementary material for: Design, Synthesis, Anti-Inflammatory Activity, DFT Modeling and Docking Study of New Ibuprofen Derivatives
Source: MDPI journal article supplement (doi:10.3390/ijms25063558), 2024-03-21
Supplement: s1 [file s1]

**Table S1:** The  $^1\text{H}$  NMR data of the HI and IA.

| Comp. | $\delta$ (ppm)                                                                                                                                                                                                                                                                                            |                                                                                      |
|-------|-----------------------------------------------------------------------------------------------------------------------------------------------------------------------------------------------------------------------------------------------------------------------------------------------------------|--------------------------------------------------------------------------------------|
|       | 9.13(1H, br, NH), 7.21-7.04 (4H, m, ArH), 4.18(2H, s, NH <sub>2</sub> ), 3.45(2H, s, CH <sub>2</sub> ), 2.39 (2H, s, CH <sub>2</sub> ), 1.80(1H, s, CH), 1.29 (3H, m, CH <sub>3</sub> ), 0.84-0.82(6H, m, (CH <sub>3</sub> ) <sub>2</sub> ).                                                              |                                                                                      |
|       | $\Delta$ (ppm) map (existing)                                                                                                                                                                                                                                                                             | $\delta$ (ppm) map (analyzed)                                                        |
| HI    | 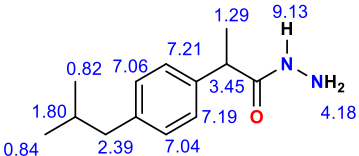                                                                                                                                                                                                                         |    |
|       | $\delta$ (ppm)                                                                                                                                                                                                                                                                                            |                                                                                      |
|       | 9.95(1H, br, NH), 7.24-7.05 (4H, m, ArH), 3.59(2H, s, CH <sub>2</sub> ), 3.31(2H, s, CH <sub>2</sub> ), 2.44(2H, s, CH <sub>2</sub> ), 2.44(2H, s, CH <sub>2</sub> ), 2.40 (3H, m, CH <sub>3</sub> ), 2.39 (3H, m, CH <sub>3</sub> ), 2.12(H, s, CH), 0.85-0.83(6H, m, (CH <sub>3</sub> ) <sub>2</sub> ). |                                                                                      |
|       | $\Delta$ (ppm) map (existing)                                                                                                                                                                                                                                                                             | $\delta$ (ppm) map (analyzed)                                                        |
| IA    |                                                                                                                                                                                                                        |  |

\*ppm: part per million,  $\delta$  =shift value of  $^1\text{H}$ NMR

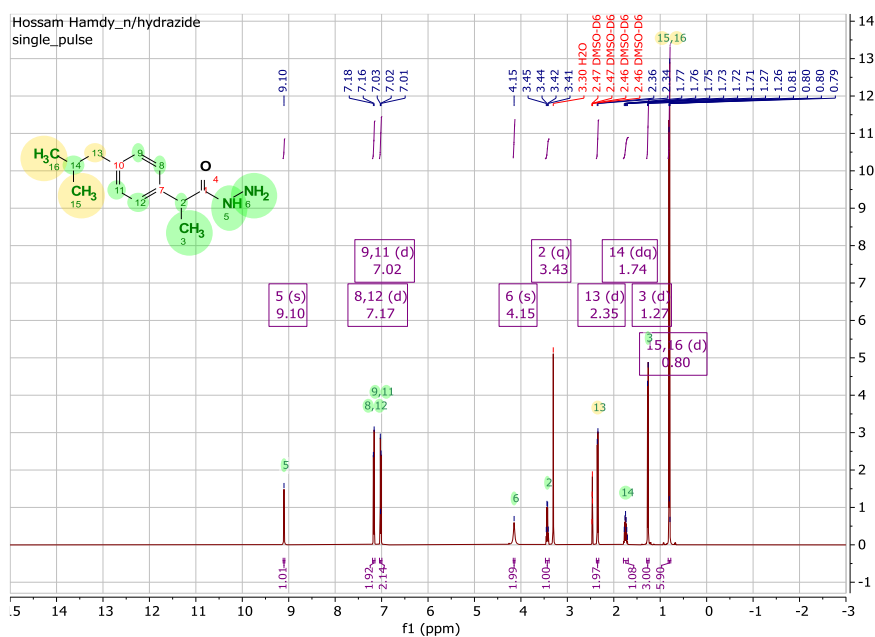

**Figure S1:**  $^1\text{H}$ NMR spectrum of Hydrazide Ibuprofen (HI).

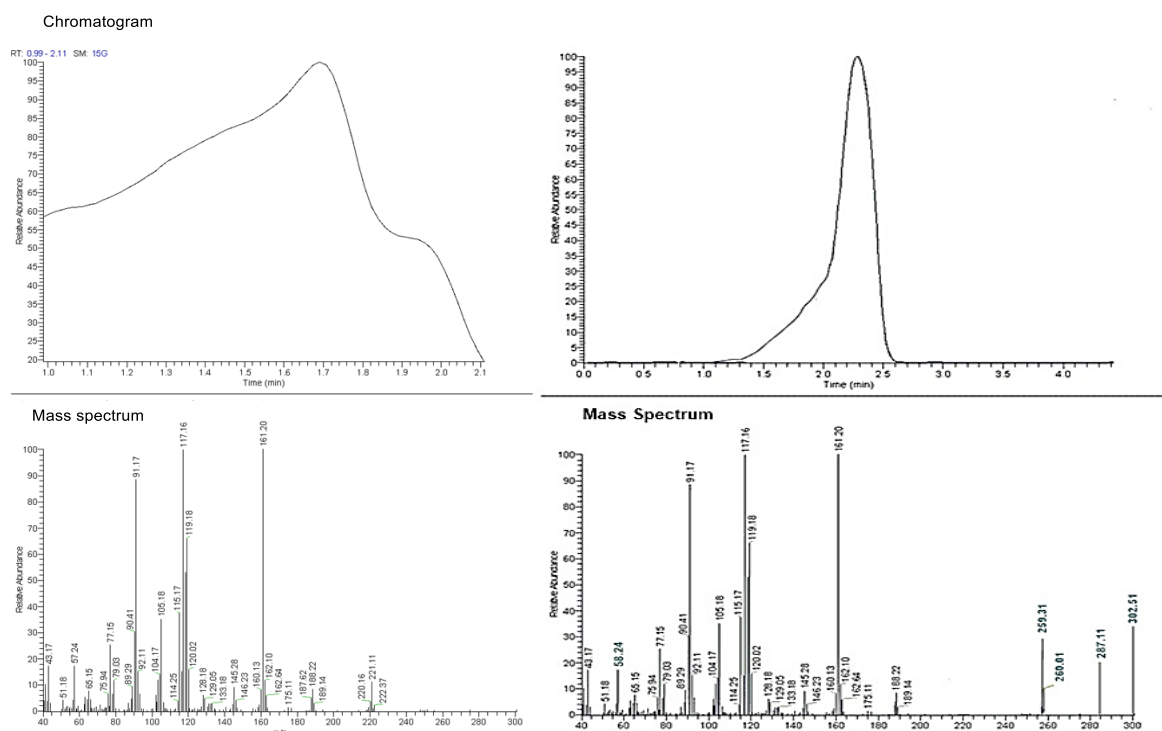

**Figure S2:** Chromatogram and mass spectrum of **HI** (on Left) and **IA** (on Right).

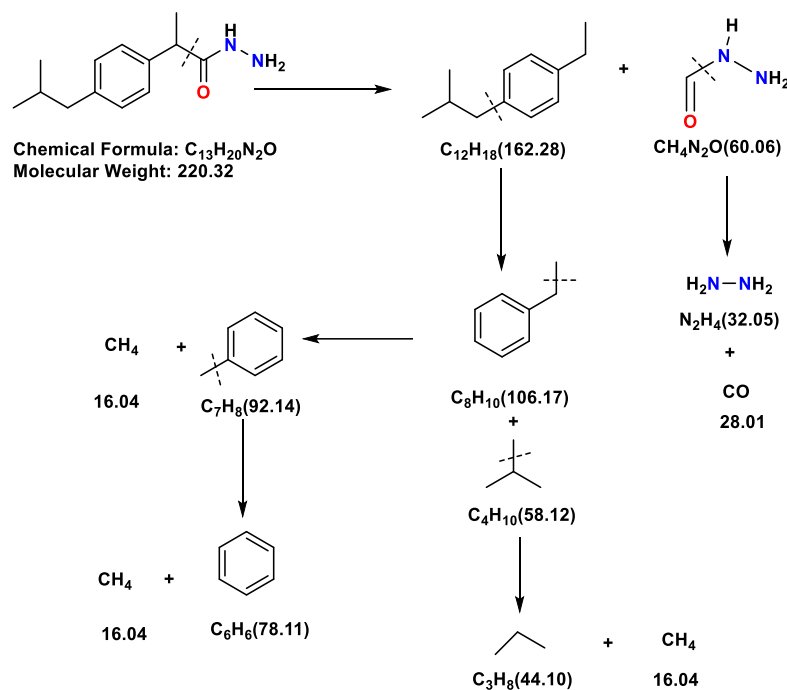

**Scheme S1:** The chromatogram of pathway fragmentation of Hydrazide Ibuprofen (**HI**).

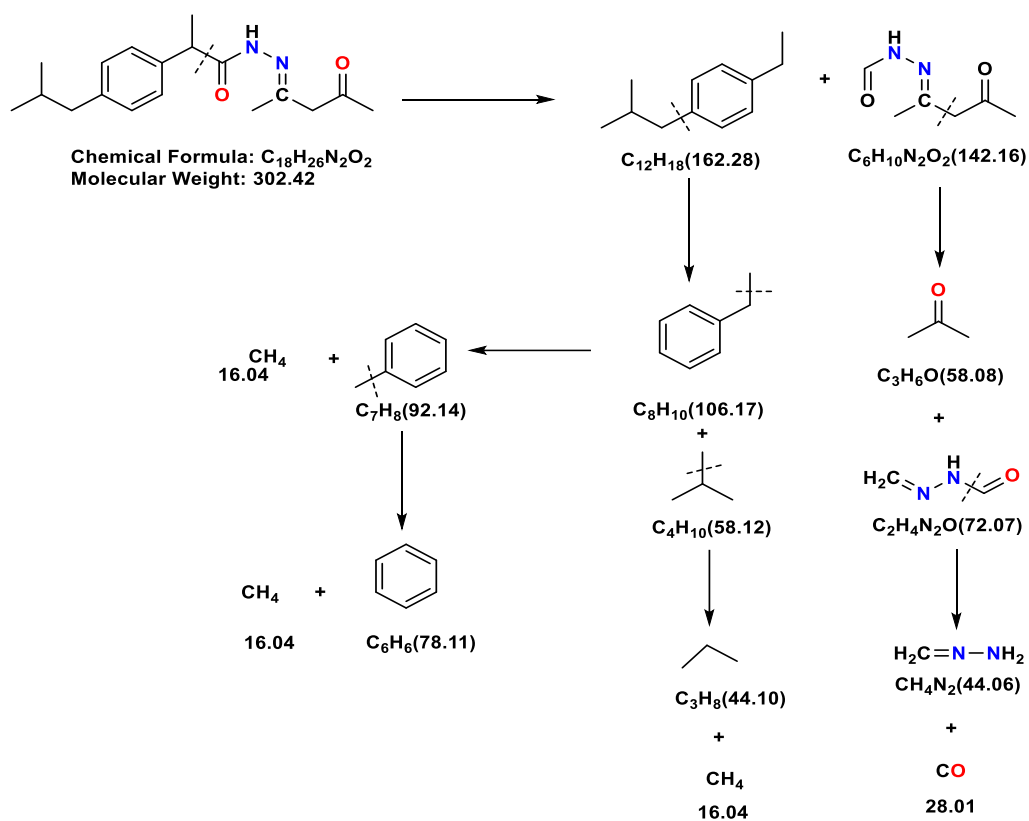

**Scheme S2:** The chromatogram of pathway fragmentation of **IA** ligand.

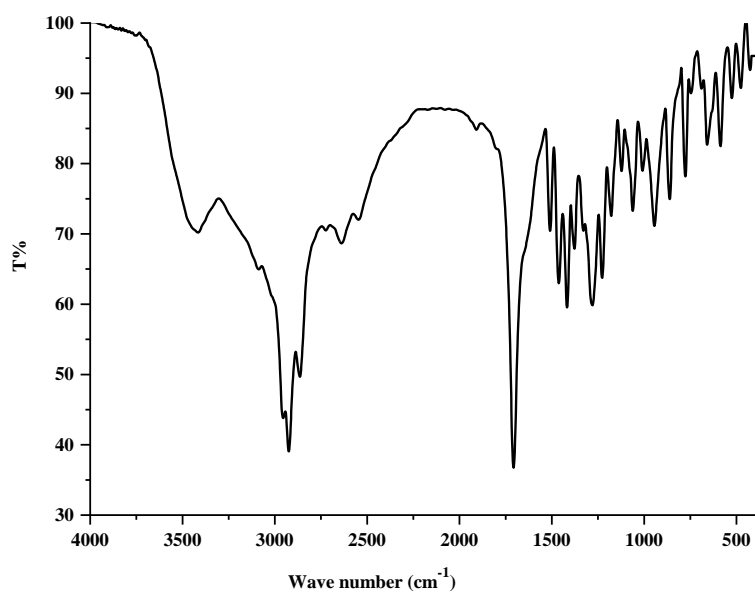

**Figure S3:** FTIR spectrum of the parent drug (**ibuprofen**).

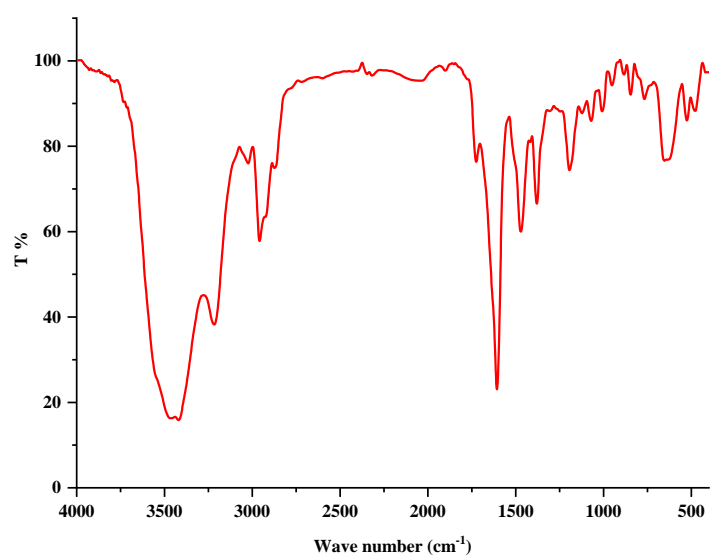

**Figure S4:** FTIR spectrum of the ligand **IA**.

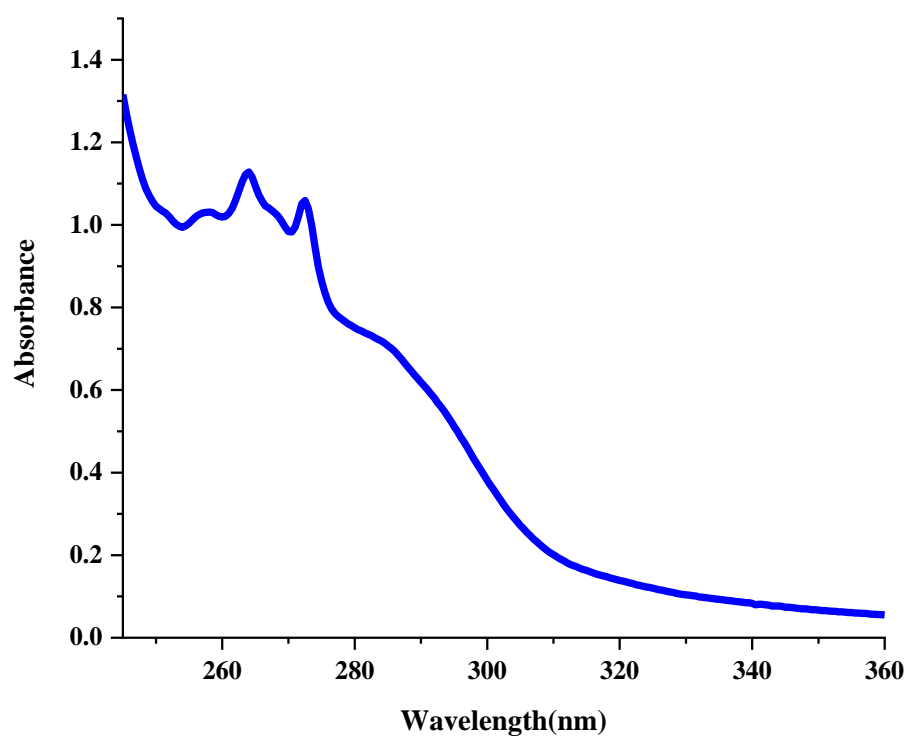

**Figure S5:** UV-Vis. spectrum of the ligand **IA**.

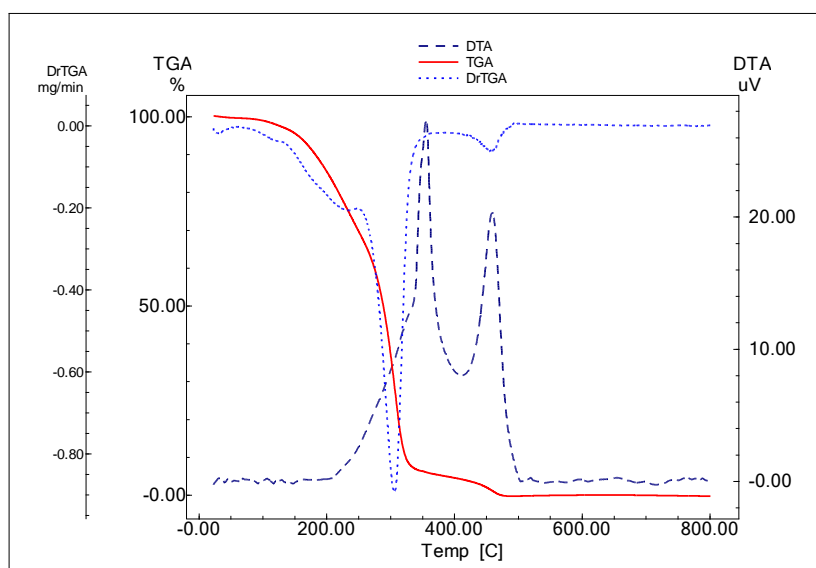

**Figure S6:** Thermal decomposition of Schiff base IA.

**Table S2:** TG/DTG and DTA data of IA.

| <i>Compound</i> | <i>Temp. range °C</i> | <i>DTA peak<br/>temp. °C</i> | <i>Peak type</i> | <i>ΔH (KJ/g)</i> | <i>Process</i>       |
|-----------------|-----------------------|------------------------------|------------------|------------------|----------------------|
| <b>IA</b>       | 111.7-136             | 130                          | Endo             | 0.017            | Ligand decomposition |
|                 | 346-367               | 355                          | Exo              | -0.401           | Ligand decomposition |
|                 | 436-480               | 460                          | Exo              | -0.0147          | Final decomposition  |

| <i>Compound</i> | <i>Temp. range<br/>°C</i> | <i>DTG<br/>Temp.<br/>°C</i> | <i>Mass loss %</i> |                   | <i>Process</i>          | <i>expected<br/>products</i> |
|-----------------|---------------------------|-----------------------------|--------------------|-------------------|-------------------------|------------------------------|
|                 |                           |                             | <i>Found</i>       | <i>Calculated</i> |                         |                              |
| <b>IA</b>       | 261-321                   | 306                         | 96.61              | 95.04             | Ligand<br>decomposition | 0.95 IA                      |
|                 | 443-473                   | 458                         | 3.68               | 4.96              | Final<br>decomposition  | 0.50 IA                      |

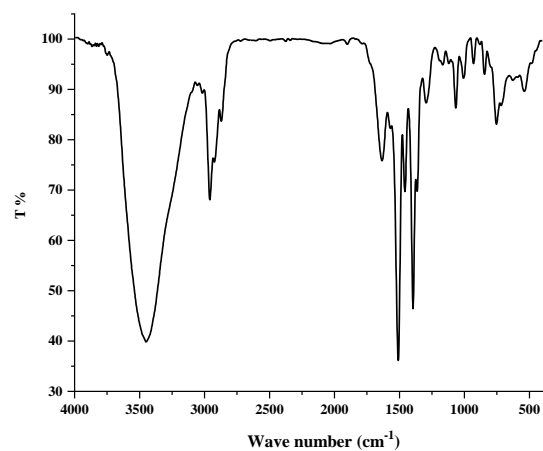

**Figure S7:** FTIR spectrum of  $[\text{Cu}(\text{IA})\text{Cl}_2 \cdot \text{H}_2\text{O}]6\text{H}_2\text{O}$ .

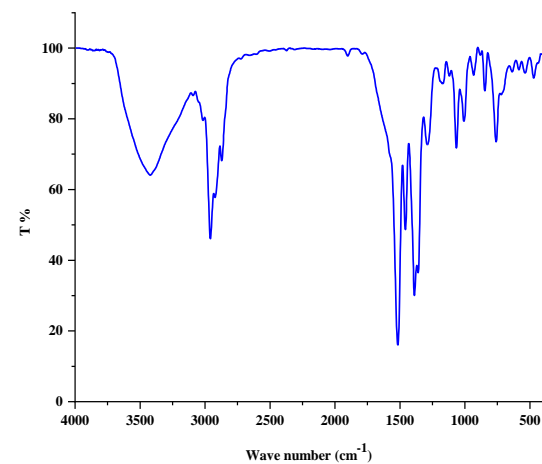

**Figure S8:** FTIR spectrum of  $[\text{Ni}(\text{IA})(\text{H}_2\text{O})_3]\text{Cl}_2 \cdot \text{H}_2\text{O}$ .

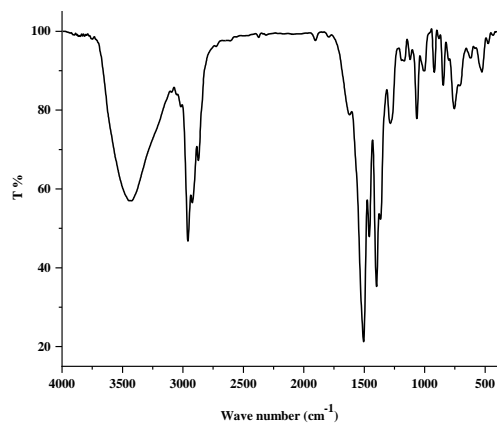

**Figure S9:** FTIR spectrum of  $[\text{Co}(\text{IA})\text{H}_2\text{OCl}]\text{Cl} \cdot \text{H}_2\text{O}$ .

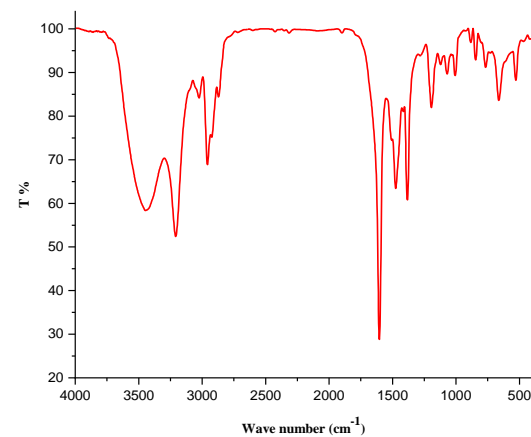

**Figure S10:** FTIR spectrum of  $[\text{Gd}(\text{IA})_2(\text{H}_2\text{O})(\text{NO}_3)]2\text{H}_2\text{O}$ .

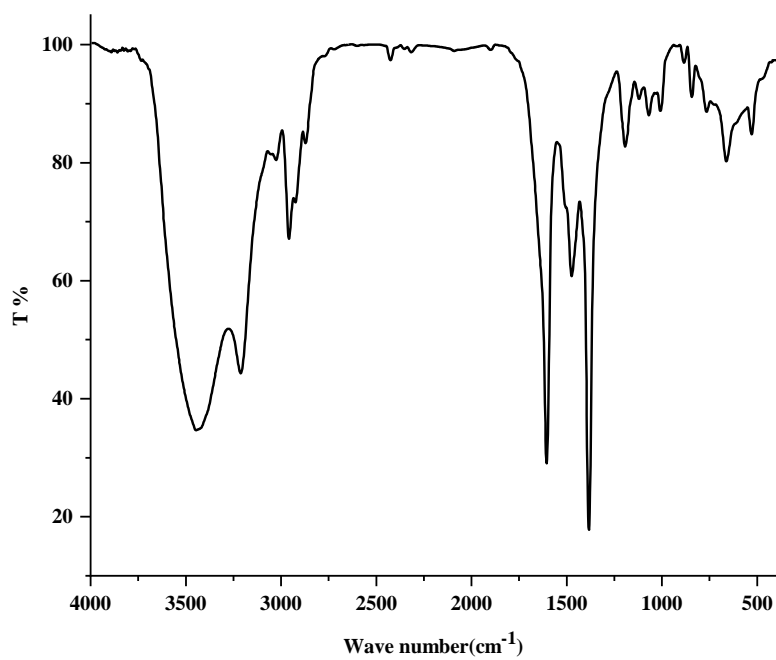

**Figure S11:** FTIR spectrum of  $[\text{Sm}(\text{IA})_2\text{H}_2\text{O NO}_3](\text{NO}_3)_2 \cdot 2\text{H}_2\text{O}$ .

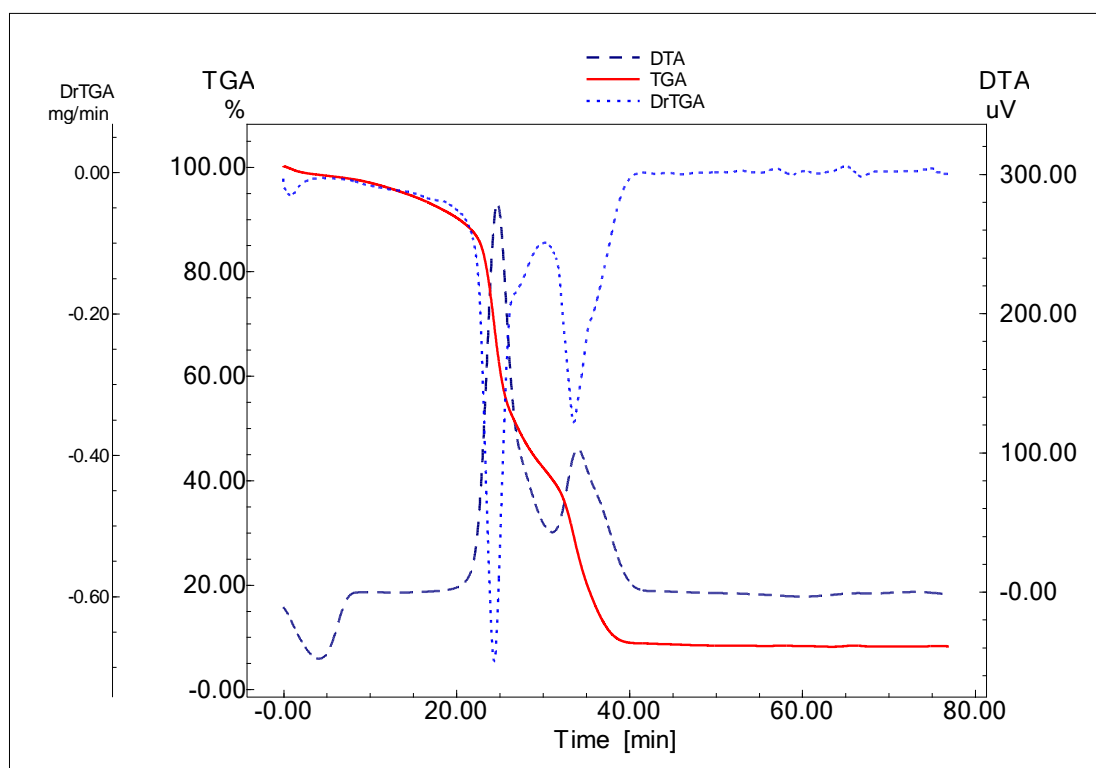

**Figure S12:** TGA/TG and DTA curves of  $[\text{Ni}(\text{IA})(\text{H}_2\text{O})_2 \text{Cl}]\text{Cl} \cdot \text{H}_2\text{O}$  complex.



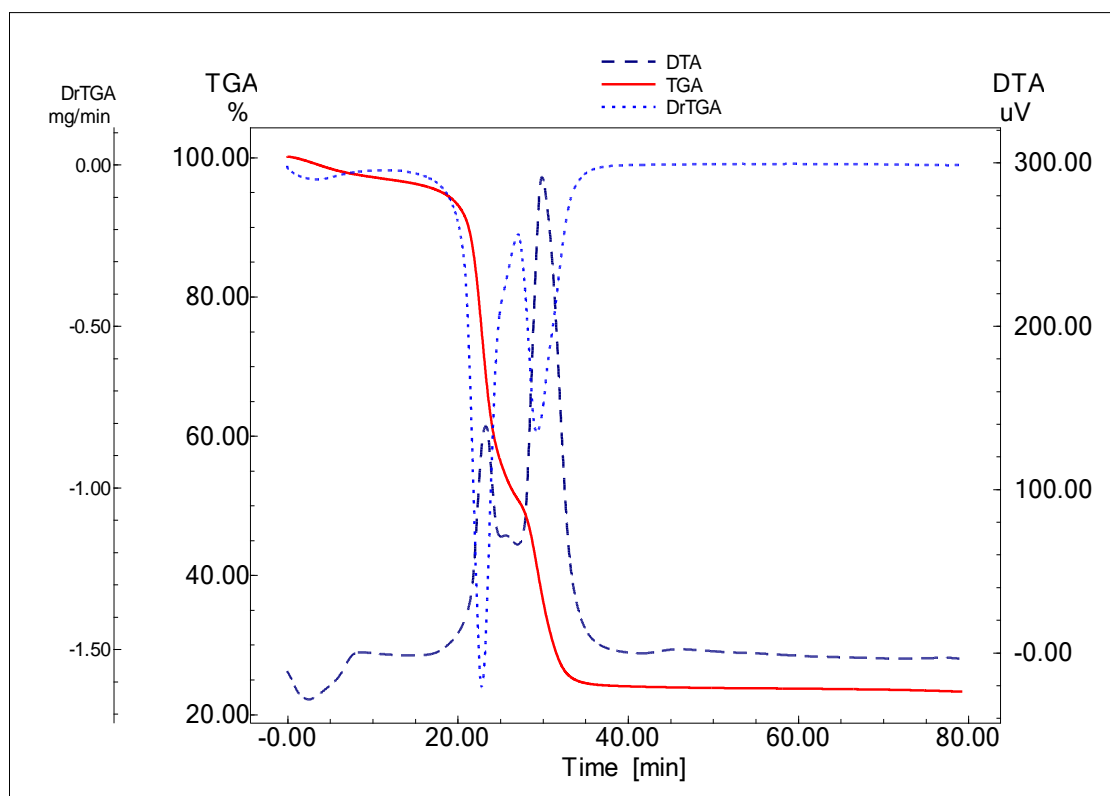

**Figure S13:** TGA/TG and DTA curves of  $[\text{Co}(\text{IA})\cdot\text{H}_2\text{O}\cdot\text{Cl}_2] \cdot 2\text{H}_2\text{O}$  complex.

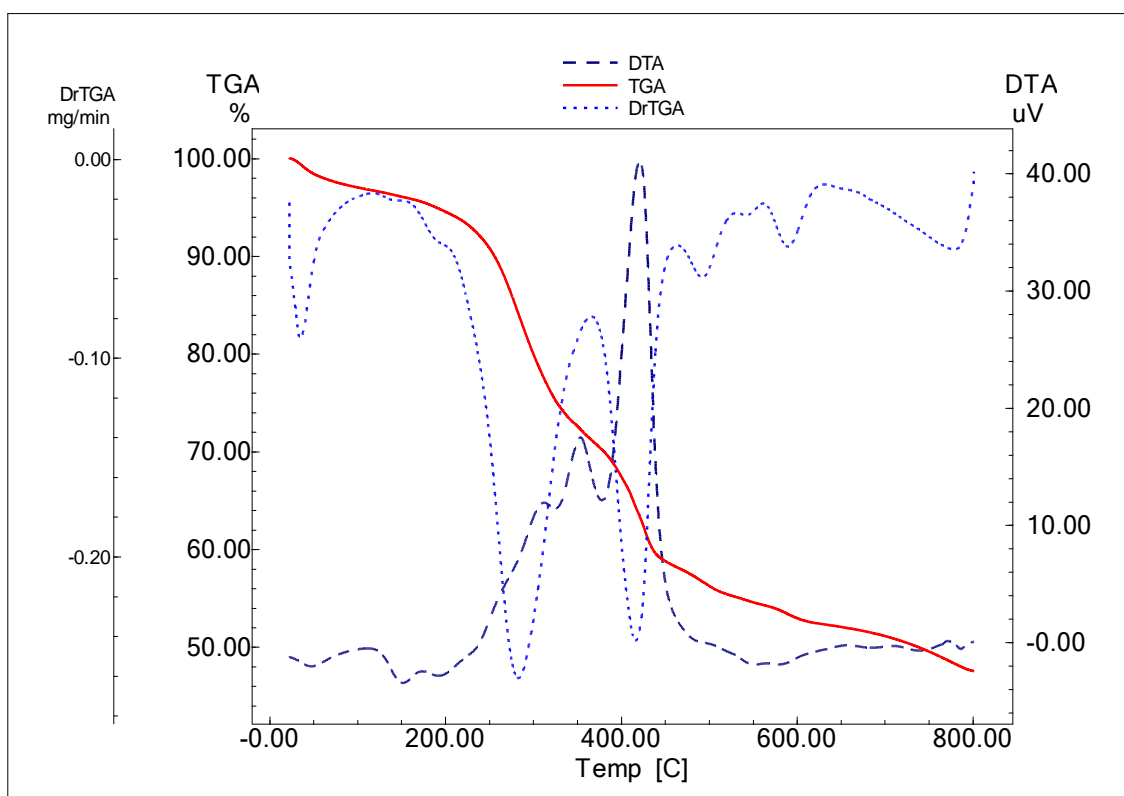

**Figure S14:** TGA/TG and DTA curves of  $[\text{Gd}(\text{IA})_2(\text{NO}_3)_2 (\text{H}_2\text{O})]\text{NO}_3 \cdot 2\text{H}_2\text{O}$  complex.

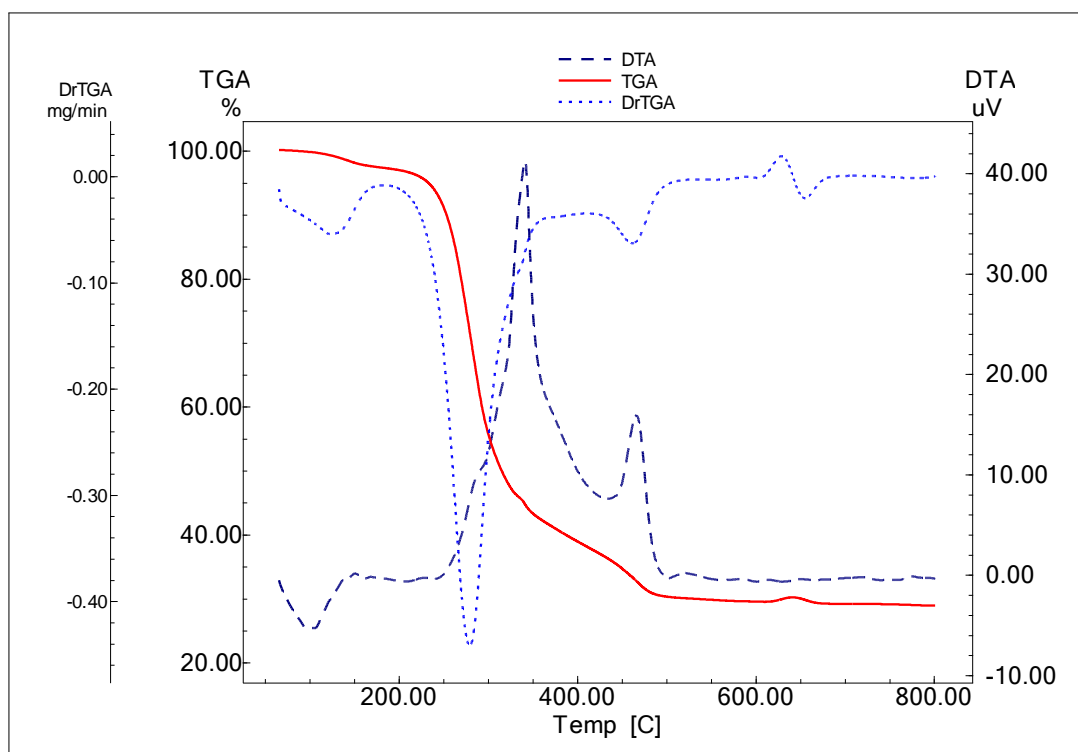

**Figure S15:** TGA/TG and DTA curves of  $[\text{Sm}(\text{IA})_2(\text{NO}_3)_2]\text{NO}_3 \cdot 3\text{H}_2\text{O}$  complex.

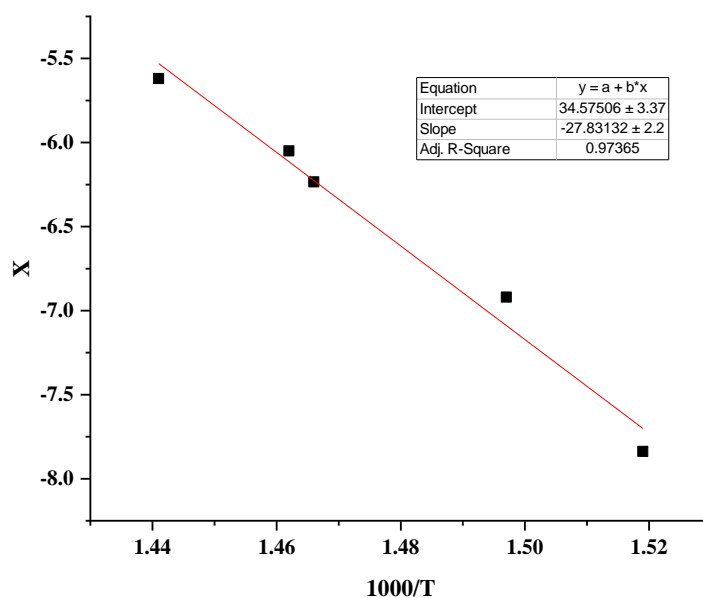

**Figure S16:** Fit-linear curve of liberation of coordinate water step of  $\text{Cu-L2}$  complex.

**Table S3:** DTA of Complexes derived from IA Schiff base.

| <i>Compound</i>                                                                                             | <i>Temp. range</i><br><i>°C</i> | <i>DTA peak temp</i><br><i>°C</i> | <i>Peak type</i> | <i>ΔH</i><br><i>(KJ/g)</i> | <i>Process</i>                                    |
|-------------------------------------------------------------------------------------------------------------|---------------------------------|-----------------------------------|------------------|----------------------------|---------------------------------------------------|
| [Cu(IA)(H <sub>2</sub> O) Cl <sub>2</sub> ]6H <sub>2</sub> O                                                | 28-78                           | 56                                | Endo             | 0.550                      | Dehydration                                       |
|                                                                                                             | 284-328                         | 308                               | Exo              | -0.851                     | Coordination sphere+ Partial Ligand decomposition |
|                                                                                                             | 341-356                         | 350                               | Exo              | -0.204                     | Ligand decomposition                              |
| [Ni(IA)(H <sub>2</sub> O) <sub>2</sub> Cl]Cl.H <sub>2</sub> O                                               | 389-437                         | 423,434                           | Exo              | -3.47                      | Final decomposition                               |
|                                                                                                             | 46-164                          | 86                                | Endo             | 2.29                       | Dehydration                                       |
|                                                                                                             | 289-362                         | 352                               | Exo              | -11.11                     | Coordination sphere+ Ligand decomposition         |
| [Co(IA) (H <sub>2</sub> O) Cl <sub>2</sub> ] 2H <sub>2</sub> O                                              | 387-437                         | 400,403                           | Exo              | -3.68                      | Final decomposition                               |
|                                                                                                             | 25-198                          | 46                                | Endo             | 0.518                      | Dehydration                                       |
|                                                                                                             | 251-280                         | 273                               | Exo              | -1.26                      | Coordination sphere+ Ligand decomposition         |
| [Gd(IA) <sub>2</sub> (NO <sub>3</sub> ) <sub>2</sub> (H <sub>2</sub> O)] NO <sub>3</sub> .2H <sub>2</sub> O | 319-360                         | 351                               | Exo              | -3.36                      | Final decomposition                               |
|                                                                                                             | 133-161                         | 48                                | Endo             | 0.018                      | Dehydration                                       |
|                                                                                                             | 340-367                         | 352                               | Exo              | -0.382                     | Coordination sphere+ Ligand decomposition         |
|                                                                                                             | 397-445                         | 424                               | Exo              | 0.710                      | Ligand decomposition                              |
|                                                                                                             | 487-510                         | 499                               | Exo              | -0.069                     | Final decomposition                               |
| [Sm(IA) <sub>2</sub> (NO <sub>3</sub> ) <sub>2</sub> ]NO <sub>3</sub> .3H <sub>2</sub> O                    | 56-151                          | 97                                | Endo             | 0.050                      | Dehydration                                       |
|                                                                                                             | 330-350                         | 340                               | Exo              | -2.71                      | Ligand decomposition                              |
|                                                                                                             | 452-482                         | 466                               | Exo              | -0.234                     | Ligand decomposition                              |
|                                                                                                             | 510-550                         | 512                               | Exo              | -0.109                     | Final decomposition                               |

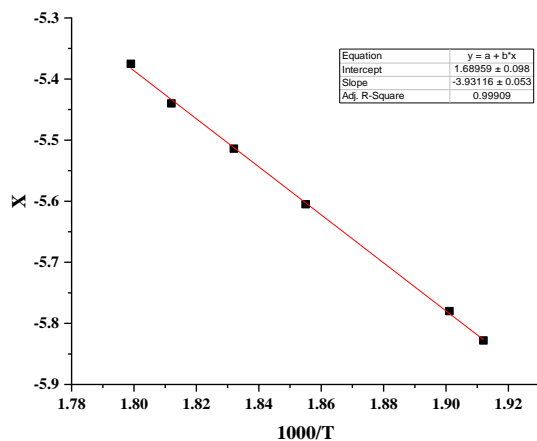

**Figure S17:** Fit-linear curve of liberation of coordinate water step of **Ni-IA** complex.

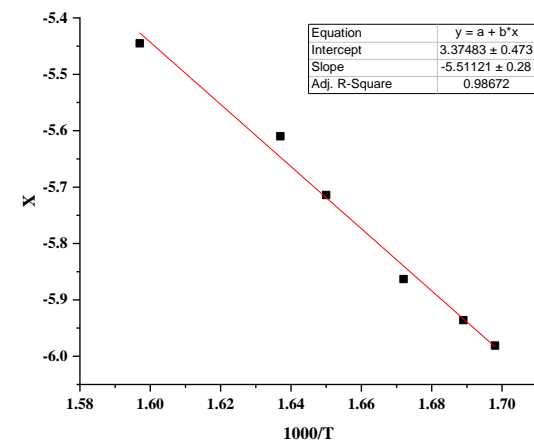

**Figure S18:** Fit-linear curve of liberation of coordinate water step of **Co-IA** complex.

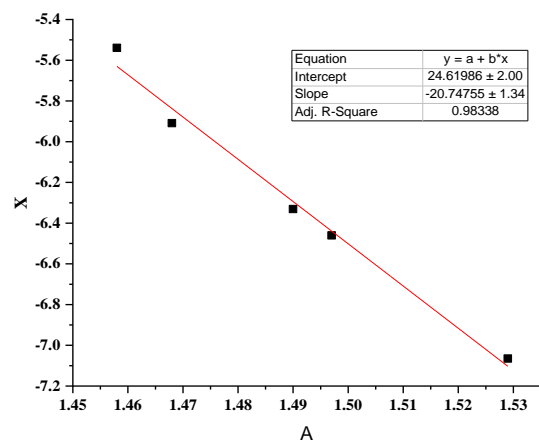

**Figure S19:** Fit-linear curve of liberation of coordinate water step of **Gd-IA** complex.

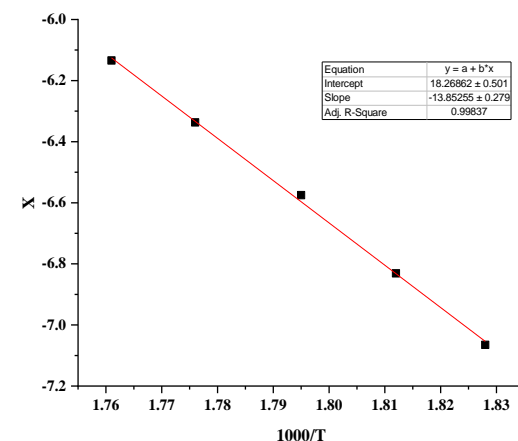

**Figure S20:** Fit-linear curve of liberation of coordinate water step of **Sm-IA** complex.

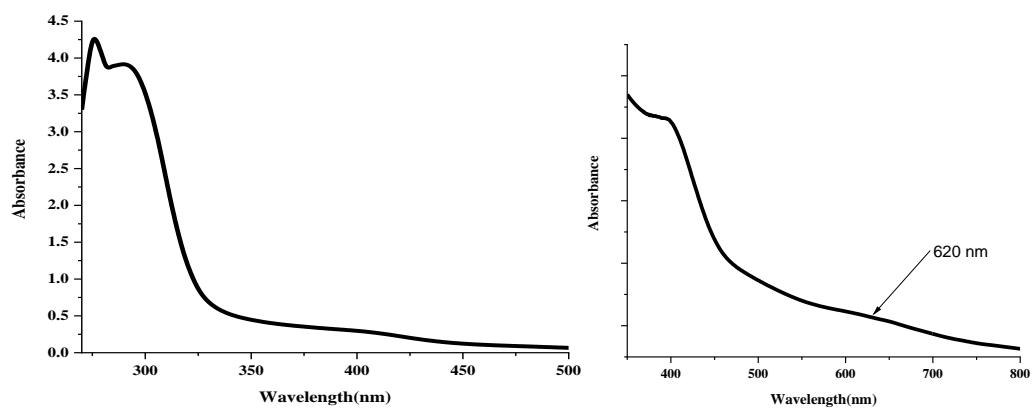

**Figure S21:** UV-Vis. spectrum of Ni-IA.

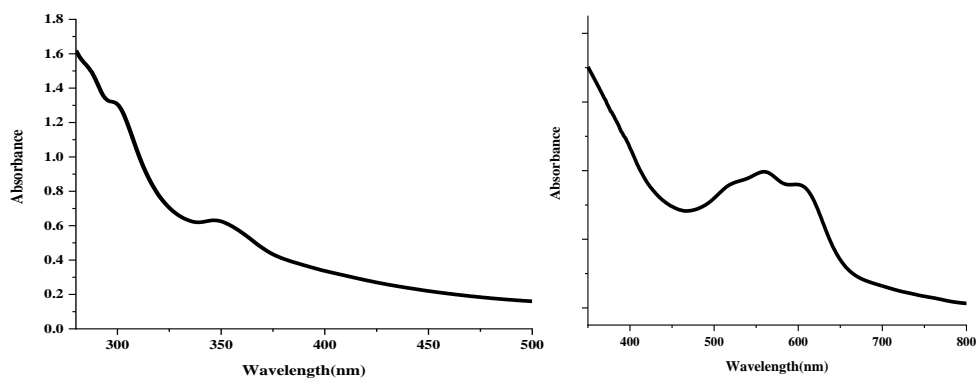

**Figure S22:** UV-Vis. spectrum of Co-IA.

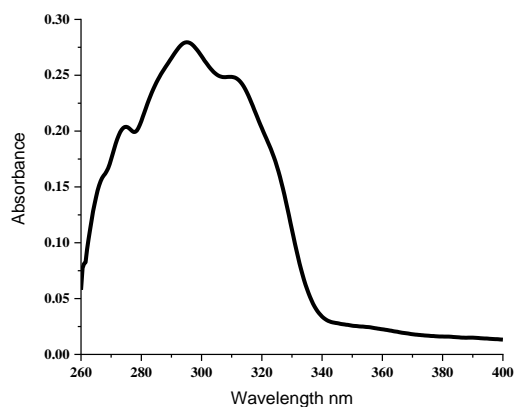

**Figure S23:** UV-Vis. spectrum of Gd-IA

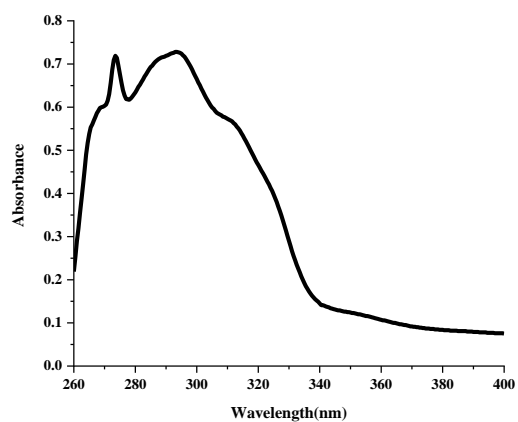

**Figure S24:** UV-Vis. spectrum of Sm-IA

**Table S4:** The magnetic properties and electronic spectra of IA ligand and its complexes

| Comp. | Peak |                  | $\varepsilon^*$<br>( $M^{-1}cm^{-1}$ )<br>x10 <sup>4</sup> | Assignment                                                         | 10Dq             |        | $\mu_{eff}$<br>(B.M) | Postulated Structure                                             |
|-------|------|------------------|------------------------------------------------------------|--------------------------------------------------------------------|------------------|--------|----------------------|------------------------------------------------------------------|
|       | nm   | cm <sup>-1</sup> |                                                            |                                                                    | cm <sup>-1</sup> | kJ/mol |                      |                                                                  |
| IA    | 257  | 38910            | 10.34                                                      | $\pi \rightarrow \pi^*$                                            | ---              | ---    | ---                  | ---                                                              |
|       | 264  | 37878            | 11.27                                                      |                                                                    |                  |        |                      |                                                                  |
|       | 272  | 36764            | 10.59                                                      | n→π*                                                               |                  |        |                      |                                                                  |
| Cu-IA | 267  | 37453            | 41.28                                                      | $\pi \rightarrow \pi^*$                                            | 25974            | 315    | 2.07                 | Distorted octahedral                                             |
|       | 280  | 35714            | 38.58                                                      |                                                                    |                  |        |                      |                                                                  |
|       | 351  | 28490            | 4.30                                                       | n→π*                                                               |                  |        |                      |                                                                  |
|       | 385  | 25974            | 2.92                                                       |                                                                    |                  |        |                      |                                                                  |
|       | 580  | 17241            | 42.53                                                      | t <sub>2g</sub> →e <sub>g</sub>                                    |                  |        |                      |                                                                  |
| Ni-IA | 276  | 36231            | 39.16                                                      | n→π*                                                               | 24875            | 302    | 2.46                 | Distorted octahedral                                             |
|       | 290  | 34482            | 4.33                                                       |                                                                    |                  |        |                      |                                                                  |
|       | 402  | 26385            | 2.92                                                       | <sup>3</sup> A <sub>2g</sub> → <sup>3</sup> T <sub>1g</sub> (P)    |                  |        |                      |                                                                  |
|       | 620  | 24875            | 13.18                                                      | <sup>3</sup> A <sub>2g</sub> → <sup>1</sup> E <sub>g</sub>         |                  |        |                      |                                                                  |
| Co-IA | 298  | 33557            | 6.32                                                       | n→π*                                                               | 16583            | 201    | 4.86                 | Distorted octahedral                                             |
|       | 347  | 28818            | 2.79                                                       | <sup>4</sup> T <sub>1g</sub> (F)→ <sup>4</sup> T <sub>2g</sub> (P) |                  |        |                      |                                                                  |
|       | 520  | 19230            | 2.98                                                       | <sup>4</sup> T <sub>1g</sub> (F)→ <sup>4</sup> A <sub>2g</sub> (F) |                  |        |                      |                                                                  |
|       |      |                  | 2.78                                                       |                                                                    |                  |        |                      |                                                                  |
|       | 558  | 17621            |                                                            |                                                                    |                  |        |                      |                                                                  |
|       | 603  | 16583            | 2.03                                                       |                                                                    |                  |        |                      |                                                                  |
| Gd-IA | 275  | 36363            | 2.80                                                       | $\pi \rightarrow \pi^*$                                            | ---              | ---    | 8.89                 | Capped square antiprismatic<br>/<br>Tricapped trigonal prismatic |
|       | 295  | 33898            | 2.49                                                       | n→π*                                                               |                  |        |                      |                                                                  |
|       | 311  | 32154            | 7.14                                                       | CT                                                                 |                  |        |                      |                                                                  |
| Sm-IA | 273  | 36630            | 7.29                                                       | $\pi \rightarrow \pi^*$                                            | ---              | ---    | 2.29                 | Bicapped trigonal prismatic<br>/<br>Square antiprismatic         |
|       | 293  | 34129            | 5.74                                                       | n→π*                                                               |                  |        |                      |                                                                  |
|       | 310  | 32154            | 10.34                                                      | CT                                                                 |                  |        |                      |                                                                  |

\*  $\varepsilon$ = Absorptivity,  $10^{-5}$  M in DMSO,  $M^{-1}cm^{-1}$ 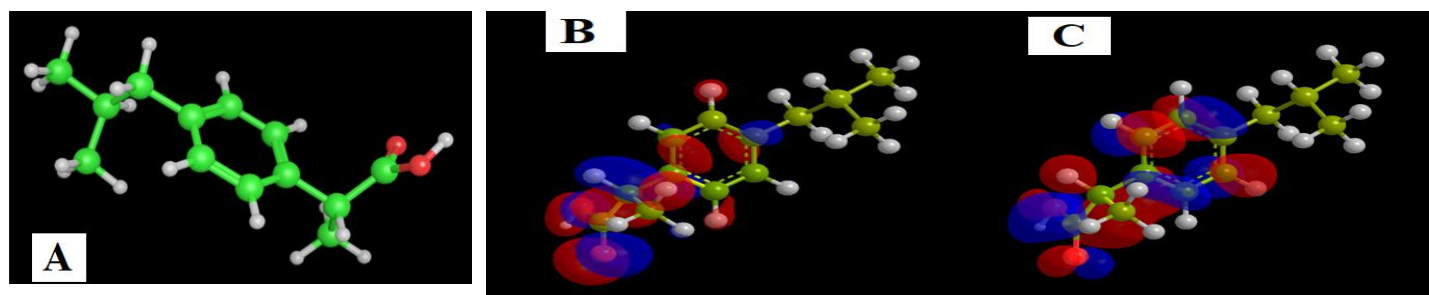**Figure S25:** The DFT simulation for the Ibuprofen drug. [A] 3D view, [B] HOMO and [C] LUMO.

**Table S5:** The DFT simulation data and ligand propertied of IA.

| <i>Compound</i>                                       | <i>Ibuprofen</i>                                 |    | <b>IA</b>                                                     |    |
|-------------------------------------------------------|--------------------------------------------------|----|---------------------------------------------------------------|----|
| <i>Formula</i>                                        | <b>C<sub>13</sub>H<sub>18</sub>O<sub>2</sub></b> |    | <b>C<sub>18</sub>H<sub>26</sub>N<sub>2</sub>O<sub>2</sub></b> |    |
| <i>Atoms</i>                                          | 33                                               |    | 48                                                            |    |
| <i>Orbitals</i>                                       | 78                                               |    | 114                                                           |    |
| <i>Electrons</i>                                      | 82                                               |    | 120                                                           |    |
| <i>SCF energy (E<sub>h</sub>)</i>                     | -93.85                                           |    | -136.49                                                       |    |
| <i>Dipole moment (D)</i>                              | 1.94                                             |    | 2.71                                                          |    |
| <i>E<sub>LUMO</sub> (E<sub>h</sub>)</i>               | 0.007                                            |    | 0.009                                                         |    |
| <i>E<sub>HOMO</sub> (E<sub>h</sub>)</i>               | -0.349                                           |    | -0.305                                                        |    |
| <i>ΔE<sub>LUMO-HOMO</sub> (E<sub>h</sub>)</i>         | 0.356 (128 nm)                                   |    | 0.314 (145 nm)                                                |    |
| <i>Ionization energy (E<sub>h</sub>)</i>              | 0.348                                            |    | 0.305                                                         |    |
| <i>electron affinity (E<sub>h</sub>)</i>              | -0.007                                           |    | -0.009                                                        |    |
| <i>Absolute electronegativity (E<sub>h</sub>)</i>     | 0.1705                                           |    | 0.148                                                         |    |
| <i>Absolute hardness (E<sub>h</sub>)</i>              | 0.211                                            |    | 0.158                                                         |    |
| <i>Absolute softness (E<sub>h</sub><sup>-1</sup>)</i> | 5.634                                            |    | 6.369                                                         |    |
| <i>Global softness (E<sub>h</sub><sup>-1</sup>)</i>   | 2.370                                            |    | 3.173                                                         |    |
| <i>Global electrophilicity (ω)</i>                    | 0.045                                            |    | 0.069                                                         |    |
| <i>Chemical potential (E<sub>h</sub>)</i>             | -0.138                                           |    | -0.148                                                        |    |
| <i>Additional electronegativity (E<sub>h</sub>)</i>   | 0.654                                            |    | 0.937                                                         |    |
| <i>Toxic.</i>                                         | no                                               |    | no                                                            |    |
| <i>Rsynth (%)</i>                                     | 66.67                                            |    | 68.2                                                          |    |
| <i>Weight (g/mol)</i>                                 | 206.28                                           |    | 302.436                                                       |    |
|                                                       | 37.30                                            |    | 58.53                                                         |    |
| <i>TPSA</i>                                           | HD                                               | HA | HD                                                            | HA |
|                                                       | 1                                                | 2  | 1                                                             | 3  |
| <i>Log p</i>                                          | 3.07                                             |    | 3.46                                                          |    |
| <i>Log S</i>                                          | -3.64                                            |    | -4.58                                                         |    |

\* **SCF energy**: Self-consistent field, **I**: Ionization potential, **Rsynth (%)**: Resynthesized %, **TPSA**: Topological polar surface area, **HD**: Hydrogen donor, **HA**: Hydrogen acceptor, **Logp**: Lipophilicity parameter and **Log S**: Water solubility parameter.

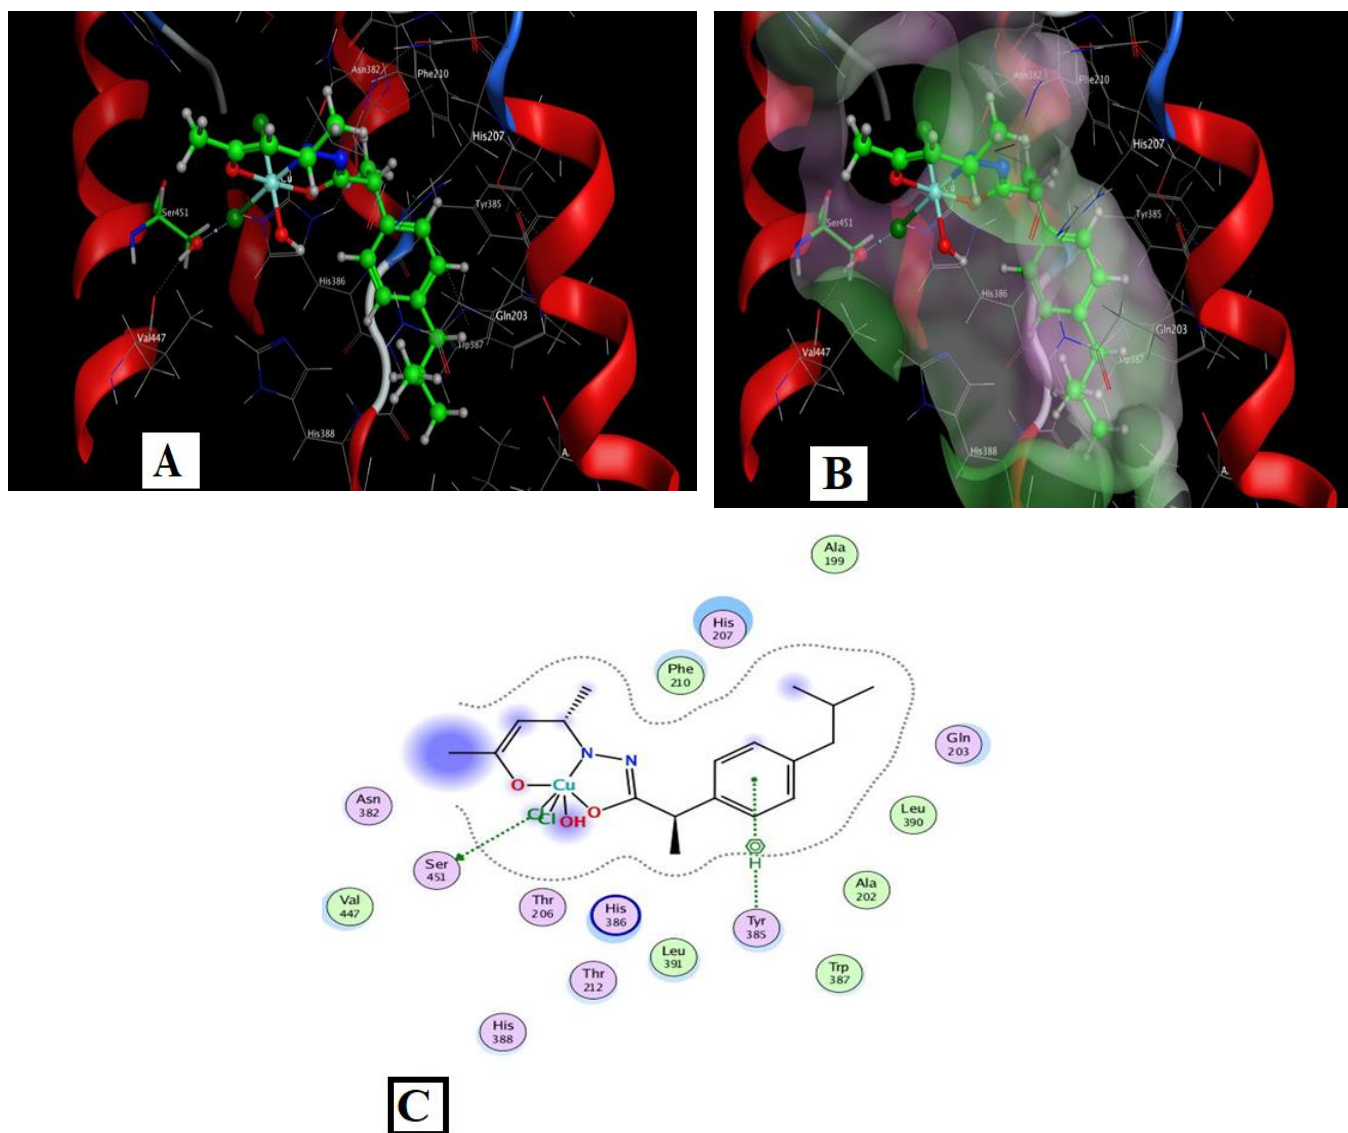

**Figure S26:** Docking model of the interaction of **Cu-IA** with **Cox2** [PDB code: 5IKT] bonding sites:  
 (A) 3D interaction diagram (B) The surface properties [Hydrophilic sites (violet color), neutral sites (white color) and lipophilic sites (green color)]. (C) 2D interaction diagram



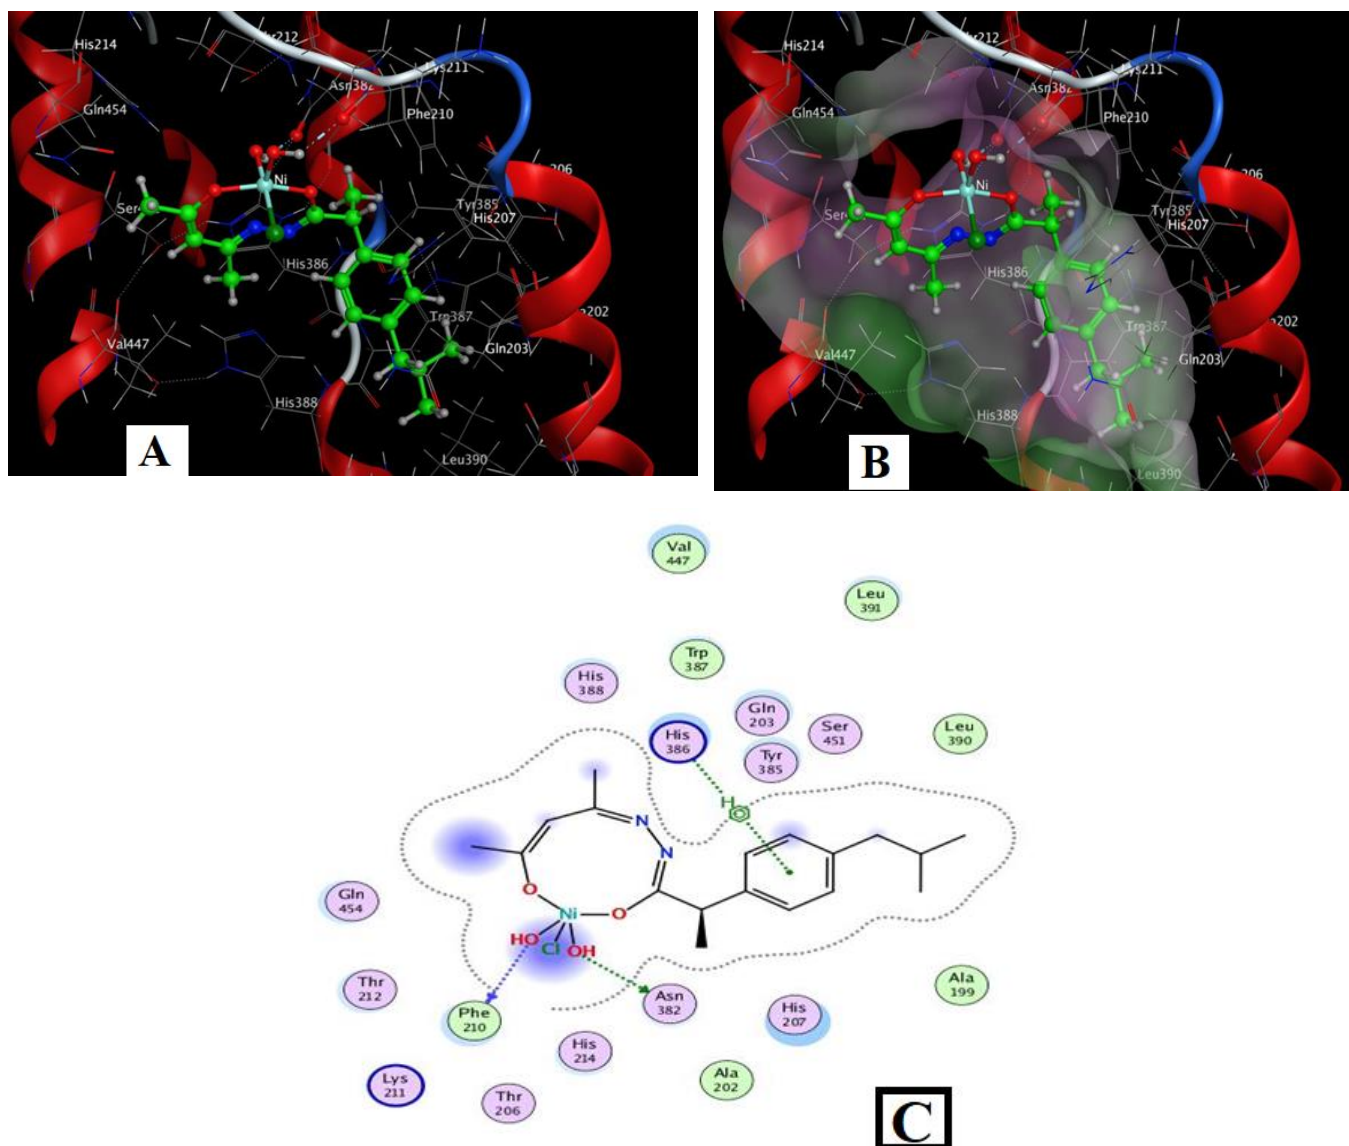

**Figure S27:** Docking model of the interaction of Ni-IA with *Cox2* [PDB code: 5IKT] bonding sites:  
 (B) 3D interaction diagram (B) The surface properties [Hydrophilic sites (violet color), neutral sites (white color) and lipophilic sites (green color)]. (C) 2D interaction diagram

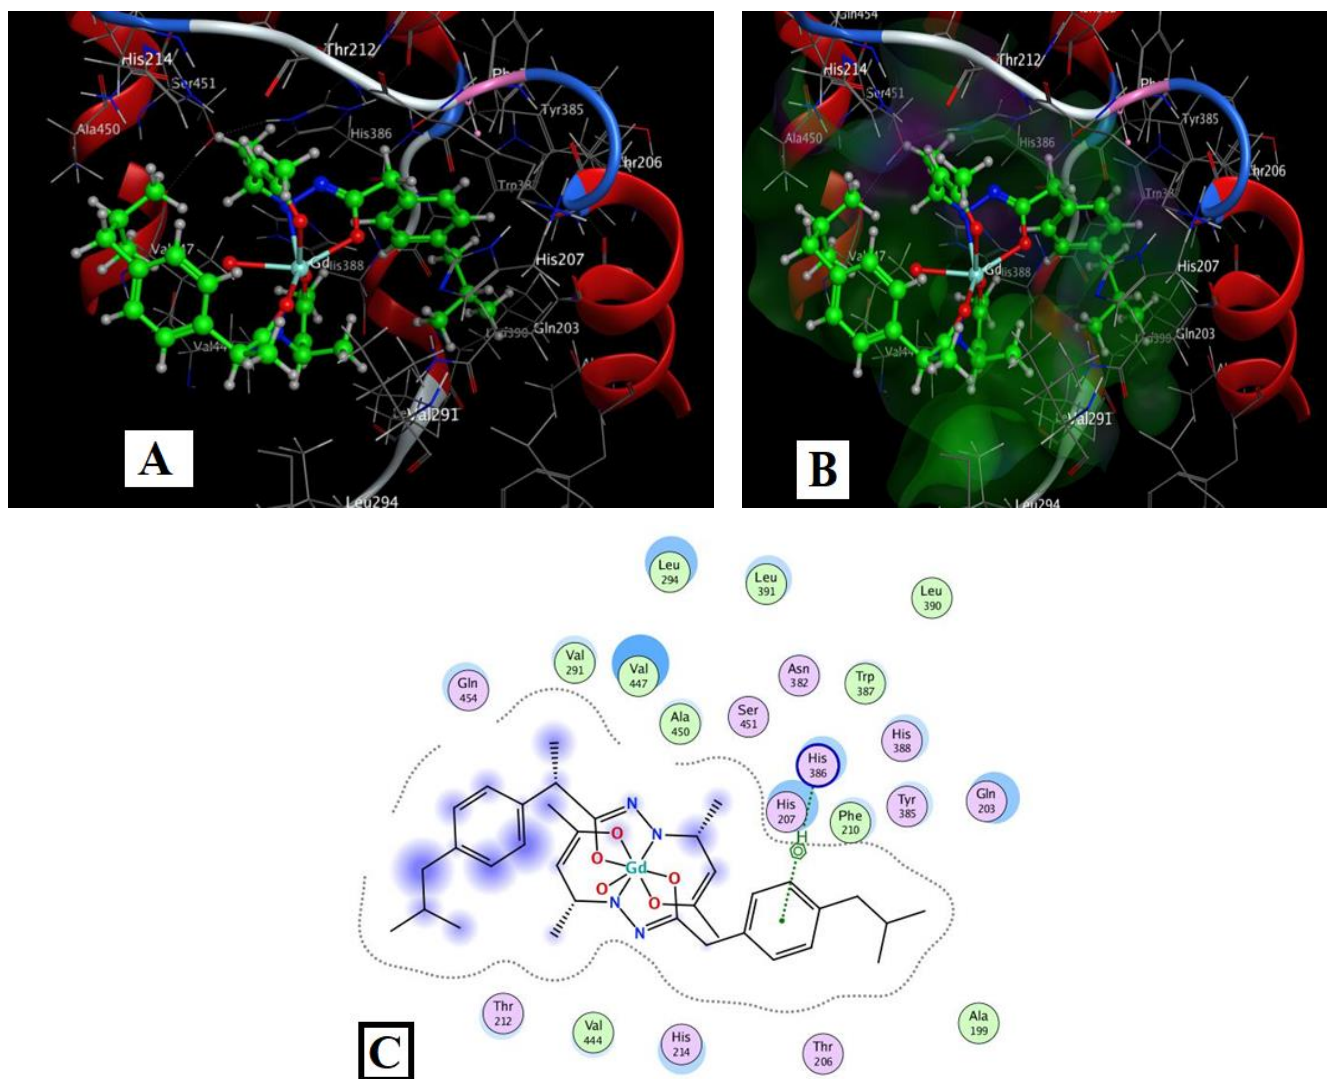

**Figure S28:** Docking model of the interaction of Gd-IA with *Cox2* [PDB code: 5IKT] bonding sites:  
 (C) 3D interaction diagram (B) The surface properties [Hydrophilic sites (violet color), neutral sites (white color) and lipophilic sites (green color)]. (C) 2D interaction diagram

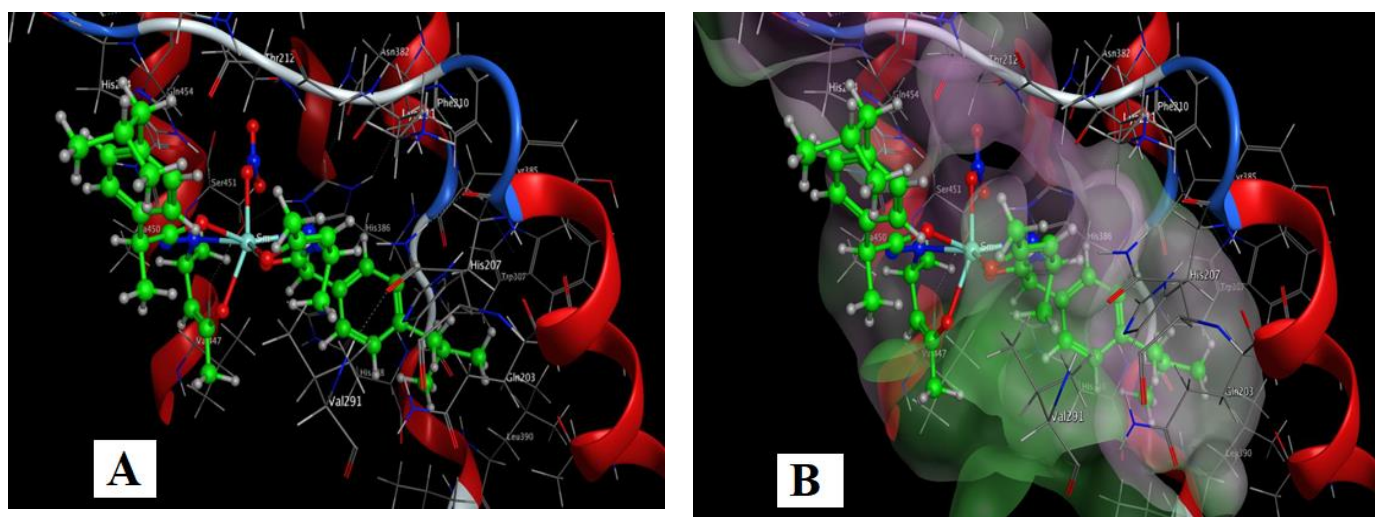

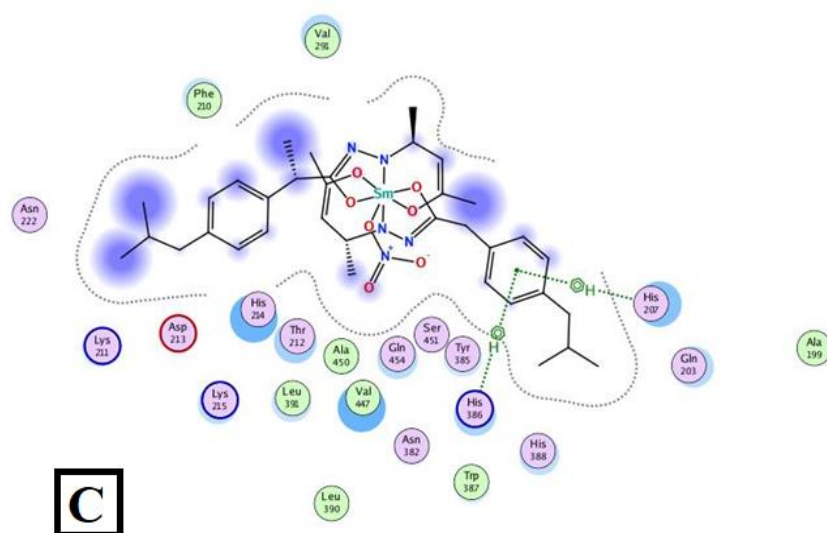

**Figure S29:** Docking model of the interaction of **Sm-IA** with **Cox2** [PDB code: 5IKT] bonding sites:  
 (D) 3D interaction diagram (B) The surface properties [Hydrophilic sites (violet color), neutral sites (white color) and lipophilic sites (green color)]. (C) 2D interaction diagram

**Table S6:** In vitro COX-1 and COX-2 inhibition of different complexes of IA Schiff base.

| Compound          | IC <sub>50</sub> COX-2 (μM) <sup>a</sup> |
|-------------------|------------------------------------------|
| Ibuprofen         | 31.4                                     |
| Indomethacin      | 0.1                                      |
| Diclofenac sodium | 0.8                                      |
| IA                | 3.6                                      |
| Cu-IA             | 3.4                                      |
| Ni-IA             | 2.5                                      |
| CO-IA             | 1.6                                      |
| Gd-IA             | 2.4                                      |
| Sm-IA             | 1.9                                      |
